1 ***Etv5* is not required for Schwann cell development but is required to regulate the**  
2 **Schwann cell response to peripheral nerve injury**

3 **Abbreviated Title:** *Etv5* inhibits peripheral nerve injury response

4 **Authors:** Anjali Balakrishnan<sup>1,2</sup>, Lauren Belfiore<sup>1,3</sup>, Lakshmy Vasan<sup>1,3</sup>, Yacine Touahri<sup>1</sup>,  
5 Morgan Stykel<sup>4</sup>, Taylor Fleming<sup>1</sup>, Rajiv Midha<sup>5</sup>, Jeff Biernaskie<sup>4</sup>, Carol Schuurmans<sup>1,2,3</sup>  
6

7 **Institutional Affiliations:**

8 <sup>1</sup> Sunnybrook Research Institute, Toronto, ON, Canada M4N 3M5

9 <sup>2</sup> Department of Biochemistry, University of Toronto, Toronto, ON, Canada M5S 1A8

10 <sup>3</sup> Department of Laboratory Medicine and Pathobiology, University of Toronto, Toronto, ON,  
11 Canada M5S 1A1

12 <sup>4</sup> Department of Comparative Biology and Experimental Medicine, University of Calgary,  
13 Calgary, AB, Canada T2N 4N1

14 <sup>5</sup> Department of Clinical Neurosciences, University of Calgary, Calgary, AB, Canada T2N  
15 4N1  
16

17 **Author Contributions:** A.B., C.S. Designed research; A.B., L.B., L.V., Y.T., M.S., T.F.  
18 Performed research; A.B., L.B., L.V., Y.T. Analyzed data; A.B., L.B., L.V., Y.T., M.S., R.M.,  
19 J.B., and C.S. Wrote the paper  
20

21 **Corresponding author:** Carol Schuurmans  
22 Sunnybrook Research Institute, S116  
23 2075 Bayview Ave  
24 Toronto, ON, Canada  
25 M4N 3M5  
26 Phone 416-480-6100 ext 3266  
27 [cschuurm@sri.utoronto.ca](mailto:cschuurm@sri.utoronto.ca)  
28

29 **Number of Figures:** 5

30 **Number of Words:** abstract (226), significance statement (115), introduction (713),  
31 discussion (909)  
32

33 **Acknowledgments:** C.S. holds the Dixon Family Chair in Ophthalmology Research at the  
34 Sunnybrook Research Institute. L.B. is funded by a CIHR *Fredrick Banting and Charles Best*  
35 *graduate award – Master’s Program.*  
36

37 **Conflicts of interest:** The authors report no conflict of interest.  
38

39 **Funding sources:** This research was funded by a Canadian Institutes of Health Research  
40 (CIHR) Project Grant (PJT- 156366) and Alberta Innovates – Health Solutions (AI-HS)  
41 Collaborative Research and Innovation Opportunities (CRIO) Project grant (#201200859) to  
42 R.M., J.B. and C.S.  
43

44

45 **ABSTRACT**

46 Schwann cells are the principal glial cells of the peripheral nervous system, and their  
47 development into myelinating glia is critically dependent on MEK/ERK signaling. Ets-domain  
48 transcription factors (*Etv1*, *Etv4*, *Etv5*) are common downstream effectors of MEK/ERK  
49 signalling, but so far, only *Etv1* has been ascribed a role in Schwann cell development, and  
50 only in non-myelinating cells. Here, we examined the role of *Etv5*, which is expressed in  
51 Schwann cell precursors, including neural crest cells and satellite glia, in Schwann cell lineage  
52 development. We analysed *Etv5<sup>tm1Kmm</sup>* mutants (designated *Etv5<sup>-/-</sup>*) at embryonic days (E) 12.5,  
53 E15.5 and E18.5, focusing on dorsal root ganglia. At these embryonic stages, satellite glia  
54 (glutamine synthetase) and Schwann cell markers, including transcriptional regulators (Sox10,  
55 Sox9, Tfp2a, Pou3f1) and non-transcription factors (Ngfr, BFABP, GFAP), were expressed  
56 in the DRG of wild-type and *Etv5<sup>-/-</sup>* embryos. Furthermore, by E18.5, quantification of Sox10<sup>+</sup>  
57 Schwann cells and NeuN<sup>+</sup> neurons revealed that these cells were present in normal numbers in  
58 the *Etv5<sup>-/-</sup>* dorsal root ganglia. We next performed peripheral nerve injuries at postnatal day 21,  
59 revealing that *Etv5<sup>-/-</sup>* mice had an enhanced injury response, generating more Sox10<sup>+</sup> Schwann  
60 cells compared to wild-type animals at five days post-injury. Thus, while *Etv5* is not required  
61 for Schwann cell development, possibly due to genetic redundancy with *Etv1* and/or *Etv4*, *Etv5*  
62 is an essential negative regulator of the peripheral nerve injury repair response.

63

64

65 **SIGNIFICANCE STATEMENT**

66 Our study sought to determine whether the ets domain transcription factor, *Etv5*, plays a role  
67 in regulating Schwann cell development and nerve repair. By using an embryonically and  
68 postnatally viable hypomorphic *Etv5* mutant allele, we demonstrated that *Etv5* is not required  
69 for the development of Schwann cells or other neural crest derivatives in the dorsal root ganglia,

70 including satellite glia and neurons. Surprisingly, loss of *Etv5* had a direct impact on the  
71 Schwann cell repair response post-injury, resulting in more Schwann cells populating the distal  
72 injured nerve site compared to wild-type animals. Thus, this work describes for the first time a  
73 role for *Etv5* in regulating the Schwann cell repair response after peripheral nerve injury.

74

75 **INTRODUCTION**

76           Macrogial cells in the peripheral nervous system (PNS) include Schwann cells and  
77 satellite glial cells, which populate peripheral ganglia, including the dorsal root ganglia (DRG)  
78 that flank the developing spinal cord. Schwann cells myelinate peripheral nerves, but also wrap  
79 non-myelinated axons to regulate neuronal survival and axonal diameter (Jessen and Mirsky,  
80 2005). Conversely, satellite glia encircle peripheral neuronal cell bodies, and have been likened  
81 to central nervous system (CNS) astrocytes (Kastriti and Adameyko, 2017). There is also  
82 growing support for a role for satellite glia in regulating pain (Jasmin et al., 2010; Ji et al.,  
83 2013; Song et al., 2018; Wang et al., 2019; Zhang et al., 2020). Despite their distinct  
84 positioning, Schwann cells (wrapping axons) and satellite glia (wrapping neuronal cell bodies)  
85 share an embryonic origin, both arising from neural crest cell (NCC) progenitors (Jessen and  
86 Mirsky, 2019a). Moreover, satellite glia can transition to a Schwann cell fate, at least *in vitro*  
87 (Cameron-Curry et al., 1993; Hagedorn et al., 2000), highlighting their close lineage  
88 relationship, and suggesting that satellite glia could replenish Schwann cells when required for  
89 repair.

90           Multiple signaling molecules and transcriptional regulators regulate Schwann cell  
91 development (Castelnovo et al., 2017). The ErbB family of receptor tyrosine kinases (RTKs),  
92 which are activated by Neuregulin 1 (NRG1), an EGF family ligand, have emerged as central  
93 regulators of Schwann cell precursor (SCP) proliferation, migration and myelination (Newbern  
94 and Birchmeier, 2010). In addition, the MEK-ERK signal transduction cascade, activated  
95 downstream of RTK signaling, is essential for Schwann cell differentiation, as revealed by the  
96 analysis of genetic mutants of ERK1 and ERK2 (Newbern et al., 2011). Conversely, if ERK  
97 signaling is ectopically activated in Schwann cells, myelination ensues (Ishii et al., 2013;  
98 Sheean et al., 2014).

99 ERK kinases have several downstream effectors that they regulate by phosphorylation,  
100 including multiple transcription factors (Tsang and Dawid, 2004), such as those of the Ets-  
101 domain (helix-turn-helix super family) family (Yang et al., 2013). In *Drosophila*, *Pointed (Pnt)*  
102 is an ets-domain transcriptional activator that is activated downstream of RTK signaling and  
103 which is required for glial cell fate specification (Klaes et al., 1994). In vertebrates, critical ets  
104 domain factors activated downstream of RTK signaling include *Etv1 (ER81)*, *Etv4 (Pea3)* and  
105 *Etv5 (Erm)*. Activation of MEK-ERK signaling initiates the expression of *Etv1* and *Etv5* to  
106 specify an oligodendrocyte fate, which are myelinating glial cells in the CNS (Li et al., 2012;  
107 Wang et al., 2012; Li et al., 2014; Ahmad et al., 2019). *Etv1* is also expressed in Schwann cells  
108 (Srinivasan et al., 2007), but it is not required for the development of myelinating Schwann  
109 cells (Fleming et al., 2016). Instead, *Etv1* facilitates interactions between peripheral axons and  
110 non-myelinating Schwann cells in Pacinian corpuscles (Sedy et al., 2006; Fleming et al., 2016).

111 *Etv5* is also expressed in the developing PNS, beginning at embryonic day (E) 9.0 in  
112 NCCs and persisting until ~ E12.5 in SCPs and in satellite glial cells (Hagedorn et al., 2000;  
113 Balakrishnan et al., 2016). *Etv5* expression is not glial specific, as it is also expressed in TrkA<sup>+</sup>  
114 sensory neurons in peripheral ganglia (Chotteau-Lelievre et al., 1997; Hagedorn et al., 2000).  
115 Blocking *Etv5* function with a dominant negative construct in NCCs *in vitro* blocks neuronal  
116 fate specification but does not affect glial differentiation, NCC survival or proliferation  
117 (Paratore et al., 2002). However, whether *Etv5* is required for Schwann cell development *in*  
118 *vivo* has not been addressed.

119 Strikingly, several genes expressed during Schwann cells development are also  
120 expressed post peripheral nerve injury and support a proliferative repair Schwann cell  
121 phenotype (Balakrishnan et al., 2016). Here, we analysed *Etv5<sup>tm1Kmm</sup>* mutant mice carrying a  
122 deletion of exons 2-5 (hereafter designated *Etv5<sup>-/-</sup>*) (Chen et al., 2005) to ask whether *Etv5* is  
123 required for Schwann cell development and the peripheral nerve injury response. We found no

124 evidence for Schwann cell developmental defects in *Etv5*<sup>-/-</sup> embryos. However, we did observe  
125 an expansion of Sox10<sup>+</sup> Schwann cells in *Etv5*<sup>-/-</sup> peripheral nerves post-injury. Thus, *Etv5* acts  
126 as a negative regulator of the Schwann cell repair response, and in its absence, more Schwann  
127 cells are generated. We discuss our findings in the context of important caveats, such as the  
128 potential for genetic redundancy with *Etv1* and/or *Etv4*, and our use of a hypomorphic mutant  
129 allele, which was necessitated by the early embryonic lethality of *Etv5* null mice.

130

## 131 MATERIAL AND METHODS

132 **Animals and genotyping.** *Etv5*<sup>tm1Kmm/J</sup> mice (Stock No. 022300) from Jackson Laboratory  
133 (ME, United States) were maintained on a 129/SvJ background. Mice were maintained as  
134 heterozygotes in a 12 hr light / 12 hr dark cycle. Heterozygous intercrosses were set up to  
135 generate homozygous mutant embryos, designated *Etv5*<sup>-/-</sup>. Pregnancy was determined by  
136 detection of a vaginal plug, with the morning of plugging designated as embryonic day (E) 0.5.  
137 PCR genotyping was performed with the following primers: wild-type forward primer: TCT  
138 GGC TCA CGA TTC TGA AG; mutant forward primer: AAG GTG GCT ACA CAG GCA  
139 AG and common reverse primer: CGG AGG TCA AGC TGT TAA GG.

140

141 **Embryo collection.** Embryo trunks or postnatal nerves were dissected in ice-cold phosphate-  
142 buffered saline (PBS), and then fixed overnight in 4% paraformaldehyde (PFA)/PBS. Fixed  
143 tissue was washed in PBS, immersed in 20% sucrose/PBS overnight, and then blocked in  
144 O.C.T™ (Tissue-Tek®, Sakura Finetek U.S.A. Inc., Torrance, CA) before storing at -80°C.  
145 Blocked tissue was sectioned on a Leica cm3050s cryostat (Richmond Hill, ON) at 10 μm and  
146 collected on SuperFrost™ Plus slides (Thermo Scientific).

147

148 **Peripheral nerve crush.** Peripheral nerve crush injuries were performed on the sciatic nerve

149 of P21 wild-type and *Etv5*<sup>-/-</sup> mice as previously described (Balakrishnan et al., 2016). Briefly,  
150 P21 animals were anesthetized (5% isoflurane for induction and 2% for maintenance),  
151 hindlimbs were shaved and sterilized, and a small incision was made to expose the sciatic  
152 nerve. A crush injury was performed using #10 forceps for one minute, and then the muscle  
153 and skin were sutured back together. Buprenorphine subcutaneous injection of 0.1 mL (100 µL  
154 of 0.03 mg/mL) were administered for pain on the day of surgery and for 4 days following,  
155 with the nerve harvested on day 5.

156

157 **Immunohistochemistry.** Sections were thawed, rinsed in PBS to remove excess O.C.T.,  
158 permeabilized in PBT (PBS with 0.1% TritonX), and then blocked in 10% normal horse  
159 serum/PBT for 1 hour. Primary antibodies were then diluted in blocking solution and incubated  
160 on sections overnight at 4°C, followed by three PBT washes. Species-specific secondary  
161 antibodies, conjugated to Alexa 488 or Alexa 555, were diluted 1/500 in PBT and applied to  
162 sections for 1 hour. Sections were washed three times in PBT and stained with 4',6-diamidino-  
163 2-phenylindole (DAPI; Santa Cruz Biotechnology) (1:5000 in PBT). Sections were washed  
164 three times in PBS and mounted in AquaPolymount (Polysciences). Primary antibodies  
165 included: rabbit anti-Etv5 (Abcam ab102010; 1:300), rabbit anti-Tfap2a (Abcam; ab52222;  
166 1:200), goat anti-Oct6 C-20 (Santa Cruz Biotechnology; sc-11661; 1:50), rabbit anti-Sox9  
167 (Millipore; AB5535; 1:500), goat anti-Sox10 (Santa Cruz Biotechnology; sc-17343; 1:400),  
168 rabbit anti-Sox10 (Abcam; AB227680; 1:200), Gfap (Dako Cytomation; #Z0334; 1:500) Ngfr  
169 (Millipore; #07-476;1:500); BFABP (Millipore; ABN14; 1:500) and mouse anti-NeuN  
170 (Millipore MAB377; 1:200).

171

172 **RNA in situ hybridization.** A digoxigenin-labeled *Etv5* riboprobe was generated as  
173 previously described using a 10× labelling mix and following the manufacturer's instructions

174 (Roche) (Li et al., 2014). The probe was hybridized overnight, and washing and staining  
175 procedures were followed as previously described (Touahri et al., 2015).

176

177 **Microscopy and image analysis.** Images were captured with a QImaging RETIGA EX digital  
178 camera and a Leica DMRXA2 optical microscope using OpenLab5 software (Improvision;  
179 Waltham MA). Image processing and analysis was performed using Image J software. Three  
180 images per wild-type and *Etv5*<sup>-/-</sup> embryo/nerve were assessed. DAPI channel images were  
181 converted into 8-bit format and the threshold was set using weighted mean intensity. Images  
182 were inverted for binary conversion. In E18.5 sections, the dorsal root ganglionic region was  
183 manually selected using free-form selection tool, while in nerve sections the entire area was  
184 assessed. The number of DAPI<sup>+</sup> cells in the selected region were calculated using particle  
185 analysis option. The colocalization of DAPI with the green channel (Sox10<sup>+</sup>/NeuN<sup>+</sup> cells) was  
186 calculated manually.

187

188 **Statistical analysis.** A minimum of three biological replicates were carried out for all assays.  
189 Statistical analysis and graphs were generated using GraphPad Prism 8 software. Student's t-  
190 test (when comparing two groups) or One-way ANOVA with TUKEY post corrections (when  
191 comparing groups of more than two) were used. All data expressed as mean value ± standard  
192 error of the mean (S.E.M.). In all experiments, a p value <0.05 was considered statistically  
193 significant, \*p < 0.05, \*\*p < 0.01, \*\*\*p < 0.001, and \*\*\*\*p < 0.0001.

194

## 195 **RESULTS**

### 196 **Schwann cell precursors develop normally in E12.5 *Etv5*<sup>-/-</sup> peripheral ganglia**

197 Previous reports have documented that *Etv5* is expressed in the Schwann cell lineage  
198 from as early as E9.0, first appearing in NCCs, and persisting until E12.5 in satellite glia and



199 Schwann cell precursors (SCPs) in the developing DRG flanking the spinal cord (Fig. 1A,B)  
200 (Hagedorn et al., 2000; Balakrishnan et al., 2016). We confirmed the expression of *Etv5* in  
201 SCPs and satellite glia using RNA in situ hybridization (Fig. 1C) and by co-immunolabeling  
202 with Sox10 (Fig. 1D), which marks the Schwann cell lineage at all developmental stages  
203 (Balakrishnan et al., 2016). To next assess whether *Etv5* is required during this early temporal  
204 window for Schwann cell lineage development, we examined E12.5 wild-type and *Etv5<sup>tm1Kmm</sup>*  
205 mutant embryos (Fig. 1B). Notably, we studied *Etv5<sup>tm1Kmm</sup>* mutant mice carrying a deletion of  
206 exons 2-5 encoding the initiation codon and a transactivation domain (hereafter *Etv5<sup>-/-</sup>*) because  
207 animals homozygous for a null allele (*Etv5<sup>tm1Hass</sup>*), which lack the Etv5 DNA binding domain,  
208 die by E8.5 (Chen et al., 2005; Kuure et al., 2010), precluding an analysis of Schwann cell  
209 lineage development.

210 We first examined the expression of Sox9 and Sox10, two SRY-box family HMG  
211 transcription factors. Sox10 is a specific marker of the Schwann cell lineage, but also marks  
212 early migrating NCCs and satellite glia throughout the embryonic period and into postnatal  
213 stages and is required for development past the immature Schwann cell (iSC) stage (Kuhlbrodt  
214 et al., 1998; Finzsch et al., 2010; Balakrishnan et al., 2016). Sox9 is also expressed early on in  
215 the Schwann cell lineage, beginning at the NCC stage (Cheung and Briscoe, 2003;  
216 Balakrishnan et al., 2016), and it regulates NCC development (Cheung and Briscoe, 2003). In  
217 E12.5 wild-type embryos, Sox9 was expressed more widely, marking SCs coalescing in the  
218 developing DRG and ventral root, but also labelling neural progenitors in the neural tube, part  
219 of the CNS, as well as other migratory NCC populations migrating over the surface ectoderm,  
220 and mesenchymal cells (Fig. 1E,G). A very similar pattern of Sox9 expression was observed  
221 in E12.5 *Etv5<sup>-/-</sup>* embryos, including in SCs in the DRG, ventral root, and the motor root of the  
222 spinal nerve (Fig. 1F,H). In E12.5 sections through the trunk, Sox9 expression overlapped with  
223 Sox10 in the DRG and ventral root, but Sox10 expression was much more restricted to the

224 Schwann cell lineage (Fig. 1E,I). A similar pattern of Sox10 expression was seen in E12.5 *Etv5*<sup>-</sup>  
225 <sup>-</sup> embryos, with Sox10<sup>+</sup> cells restricted to glial cells in the DRG and ventral root (Fig. 1F,J).

226 Transcription factors initiate developmental programs by turning on the expression of  
227 genes with functional roles in fate specification and differentiation. Brain fatty acid binding  
228 protein (BFABP) is the earliest ‘glial’ gene turned on in SCPs in a Sox10-dependent manner  
229 (Finzsch et al., 2010). Another early marker is Ngfr (also known as p75NTR), a common  
230 receptor for neurotrophins, the deletion of which results in a reduced size of peripheral ganglia  
231 and reduction in Schwann cell number (von Schack et al., 2001). In E12.5 wild-type embryos,  
232 both BFABP (Fig. 2A,A’) and Ngfr (Fig. 2C,C’) were co-expressed with Sox10 in SCPs in the  
233 DRG and also prominently in the dorsal root, the sensory root of the spinal nerve. BFABP also  
234 marked the dorsal neural tube and floor plate, while Ngfr was detected more prominently in  
235 the ventral neural tube. Very similar patterns of expression were observed in E12.5 *Etv5*<sup>-</sup>  
236 embryos, including prominent expression of BFABP (Fig. 2B,B’) and Ngfr (Fig. 2D,D’) in  
237 Sox10<sup>+</sup> SCPs in the DRG and dorsal root.

238 Thus, at E12.5, there are no notable defects in the general positioning or SCP-specific  
239 gene expression in *Etv5*<sup>-</sup> mutant DRG, ventral, and dorsal roots.

240

#### 241 **Immature Schwann cells develop normally in E15.5 *Etv5*<sup>-</sup> peripheral ganglia**

242 Between E12.5 and E15.5, some SCPs persist while others proceed on to form  
243 immature Schwann cells (iSCs) that populate the developing spinal ganglia and nerves (Jessen  
244 and Mirsky, 2005). We focused on the lumbar spinal cord in E15.5 wild-type and *Etv5*<sup>-</sup>  
245 embryos (Fig. 3A,B), and again examined the expression of Sox9 (Fig. 3C,D) and Sox10 (Fig.  
246 3E,F). Both Sox9 and Sox10 were expressed in a characteristic salt-and-pepper expression  
247 pattern in scattered SCPs and iSCs throughout the DRG and in the dorsal and ventral roots in  
248 E15.5 wild-type and *Etv5*<sup>-</sup> embryos (Fig. 3C-F). We also examined the expression of two

249 additional transcription factors with a later onset of expression in SCPs, including transcription  
250 factor AP-2 $\alpha$  (Tfap2a) (Stewart et al., 2001; Balakrishnan et al., 2016) and Sox2, an inhibitor  
251 of Schwann cell myelination that is expressed in SCPs and iSCs, but not in pro-myelinating  
252 and myelinating Schwann cells (Le et al., 2005; Adameyko et al., 2012; Balakrishnan et al.,  
253 2016). Tfap2a was expressed throughout the E15.5 wild-type DRG (Fig. 3G), while Sox2 was  
254 only detected in a few Sox10<sup>+</sup> SCPs and iSCs (Fig. 3I,I'), contrasting to the robust expression  
255 of Sox2 in the spinal cord ventricular zone (Fig. 3I,I'). Notably, both Tfap2a (Fig. 3H) and  
256 Sox2 were similarly expressed in the Schwann cell lineage in E15.5 *Etv5*<sup>-/-</sup> DRGs (Fig. 3J,J').

257 Finally, to assess the maturation process of SCPs into iSCs, we examined the expression  
258 of non-transcriptional regulators that mark the Schwann cell lineage, including BFABP (Fig.  
259 3K,L,K',L'), the intermediate filament, glial fibrillary acidic protein (GFAP) (Fig. 3M,M',N,N')  
260 and Ngfr (Fig. 3O,O',P,P'). All three of these proteins were expressed in scattered Sox10<sup>+</sup>  
261 SCPs and iSCs in both E15.5 wild-type (Fig. 3K,K',M,M',O,O') and *Etv5*<sup>-/-</sup> (Fig.  
262 3L,L',N,N',P,P') DRGs. Thus, SCPs and iSCs develop normally in *Etv5* hypomorphic mutants.

263

264 **Late immature Schwann cells/pro-myelinating Schwann cells are detected in E18.5 *Etv5*<sup>-/-</sup>**  
265 **peripheral ganglia and in the dorsal and ventral roots**

266 By E18.5, some iSCs persist, while other iSCs begin to associate with large-diameter  
267 axons to become pro-myelinating Schwann cells, whereas iSCs in contact with smaller  
268 diameter axons become non-myelinating Schwann cells (Feltri et al., 2015). We first labelled  
269 all Schwann cells in the lineage with Sox10 in E18.5 wild-type (Fig. 4A) and *Etv5*<sup>-/-</sup> (Fig. 4B)  
270 transverse sections through the lumbar spinal cord, and detected similar numbers of Sox10<sup>+</sup>  
271 Schwann cells in in the DRG, as well as in the dorsal and ventral roots in the wild-type and  
272 *Etv5*<sup>-/-</sup> mutants (Fig. 4I). Further, we examined whether the neuronal cells populating the DRG  
273 were affected by labelling the cells with NeuN, a neuronal marker. A similar number of NeuN<sup>+</sup>

274 neurons were observed in both the wild-type and *Etv5*<sup>-/-</sup> mutant DRGs (Fig. 4C,D,J). Next, we  
275 examined the expression of Pou3f1 (Oct-6), which is a marker of late iSCs/pro-myelinating  
276 Schwann cells that is required for the transition to a myelinating phenotype transition (Arroyo  
277 et al., 1998). We detected Pou3f1 expression in the ventral roots in both E18.5 wild-type (Fig.  
278 4E) and *Etv5*<sup>-/-</sup> (Fig. 4F) embryos, suggesting that Sox10 cells mature to a myelinating stage.  
279 Finally, to detect satellite glial cells in the developing DRG, we examined the expression of  
280 glutamine synthetase (Ohara et al., 2009), revealing that this marker was expressed in both  
281 wild-type (Fig. 4G) and *Etv5*<sup>-/-</sup> (Fig. 4H) mutant DRGs. Thus, in *Etv5* hypomorphic mutants,  
282 normal numbers of Schwann cells and DRG neurons are generated during development.

283

284 **Schwann cells populate the postnatal sciatic nerve in *Etv5*<sup>-/-</sup> mice and respond to injury**  
285 **with an expansion in number**

286 As a final question, we asked whether there were defects in Schwann cells found in the  
287 early postnatal nerve, at postnatal day (P) 21, when most pro-myelinating Schwann cells have  
288 converted to a myelinating phenotype (Balakrishnan et al., 2016). At P21, we observed  
289 expression of Sox10 in scattered cells throughout longitudinal sections of the sciatic nerve in  
290 both wild-type (Fig. 5A) and *Etv5*<sup>-/-</sup> (Fig. 5B) animals, and there were no differences in  
291 Schwann cell numbers between these groups in the uninjured nerve (Fig. 5E). We then  
292 subjected both P21 wild-type and *Etv5*<sup>-/-</sup> animals to a sciatic nerve crush injury, which induces  
293 a de-differentiation and subsequent expansion of Schwann cells in the distal stump by 5 days  
294 post-injury (dpi) (Balakrishnan et al., 2016). We observed an increase in the number of Sox10<sup>+</sup>  
295 Schwann cells in both P21 wild-type (p=0.028; Fig. 5C,E) and *Etv5*<sup>-/-</sup> (p=0.0001; Fig. 5D,E)  
296 distal stumps at 5 dpi, suggesting that the repair response occurs normally in *Etv5*<sup>-/-</sup> nerves.  
297 Interestingly, a significant increase in Sox10<sup>+</sup> cells was observed in *Etv5*<sup>-/-</sup> injured nerves

298 compared to wild-type injured nerves ( $p=0.0027$ ; Fig. 5E), indicating that *Etv5* normally  
299 inhibits the ability of Schwann cells to expand post injury.

300 Taken together, these studies suggest that while the Schwann cell lineage develops  
301 normally in *Etv5*<sup>-/-</sup> embryos, from embryonic to early postnatal stages, the response of *Etv5*<sup>-/-</sup>  
302 Schwann cells to injury is altered, with an increase in Sox10<sup>+</sup> Schwann cells populating near  
303 the nerve injury site.

304

## 305 **DISCUSSION**

306 In this study we investigated the role of *Etv5* in Schwann cell development using a  
307 genetic mutant that deletes exons 2-5, an allele associated with defects in stem cell self-renewal  
308 in the spermatogonial lineage (Chen et al., 2005). Using a panel of well annotated Schwann  
309 cell markers and quantitative studies at E18.5, we did not observe any notable defects in  
310 Schwann cell or neuronal differentiation in *Etv5*<sup>-/-</sup> peripheral ganglia at embryonic stages.  
311 However, following an acute peripheral nerve injury, which results in the de-differentiation of  
312 mature Schwann cells and an increase in Schwann cell proliferation (Jessen and Mirsky,  
313 2019b), more Sox10<sup>+</sup> cells were observed in *Etv5*<sup>-/-</sup> nerves, implicating *Etv5* as a negative  
314 regulator of the Schwann cell injury response. ERK1/2 signal transduction is activated  
315 downstream of NRG1 (Grossmann et al., 2009; Sheean et al., 2014), which is a critical regulator  
316 of myelination, and ERK1/2 induce Schwann cell myelination (Ishii et al., 2013; Sheean et al.,  
317 2014), including after injury (Harrisingh et al., 2004; Guertin et al., 2005; Napoli et al., 2012;  
318 Kim et al., 2013). Our findings were therefore surprising as our expectation was that *Etv5*  
319 would be a positive regulator of the injury response.

320 Notably, in our study we used an *Etv5* mutant allele that has a deletion of exons 2-5  
321 (*Etv5*<sup>tm1Kmm</sup>), which results in a very striking reduction in spermatogonial stem cell self-renewal  
322 (Chen et al., 2005). In contrast, an *Etv5* mutation that removes the DNA binding domain

323 (*Etv5<sup>tm1Hass</sup>*) is embryonic lethal at E8.5, suggesting it is a true null allele (Chen et al., 2005),  
324 but precluding us from analysing Schwann cells due to the early embryonic lethality. Due to  
325 the embryonic lethality associated with ‘more severe’ mutant alleles of *Etv5*, it is believed that  
326 our studied *Etv5* allele (exon 2-5 knocked out) is hypomorphic rather than a true null allele.  
327 Further support for the designation of *Etv5<sup>tm1Kmm</sup>* as a hypomorphic allele comes from the lack  
328 of a developmental kidney defect (Lu et al., 2009), whereas the generation of chimeric embryos  
329 using *Etv5<sup>tm1Hass</sup>* embryonic stem cells revealed that *Etv5* is required for kidney development  
330 (Kuure et al., 2010). Future studies on *Etv5* function in the Schwann cell lineage would require  
331 either the use of such a chimeric approach, or a genetic approach, such as the use of a floxed  
332 allele of *Etv5* (Zhang et al., 2009). However, even using these alternative approaches, we may  
333 not observe a Schwann cell developmental phenotype if there is genetic redundancy. Indeed,  
334 different members of the Fgf-synexpression group of ets transcription factors (*Etv1*, *Etv4*, *Etv5*)  
335 may compensate for one another to some extent, as shown for *Etv4* and *Etv5* in kidney  
336 development (Kuure et al., 2010). Thus, we may have not uncovered a role for *Etv5* in  
337 developing Schwann cells due to issues of genetic redundancy. Nevertheless, despite these  
338 caveats, we can conclude that the reduced levels of *Etv5* function associated with the *Etv5<sup>tm1Kmm</sup>*  
339 allele, which has striking phenotypic consequences in other lineages, does not impact early  
340 Schwann cell development, but does impact the Schwann cell response to injury.

341 An important area for future studies will be to further examine the role of *Etv5* in mature  
342 Schwann cells. Schwann cell transplants have the potential to aid peripheral nerve repair, and  
343 efforts are being made to improve the isolation and expansion of these cells to provide an  
344 adequate source for repair purposes. In this regard it is interesting that both human nerve-  
345 derived and skin derived Schwann cells cultured *in vitro* express a large number of Schwann  
346 cell markers associated with an early developmental phenotype, which includes *Etv5* (Stratton  
347 et al., 2017). In our study here we provide the first glimpse that a decline in *Etv5* expression

348 leads to more number of Schwann cells following a peripheral nerve crush injury. One  
349 possibility is that the knockdown of this factor could thus be exploited for regenerative  
350 purposes.

351 RTK-ERK signaling is crucial for Schwann cell differentiation (Newbern et al., 2011)  
352 and has been implicated in the myelination process, in part by inducing the expression of pro-  
353 myelinating transcription factors such as *Yy1* (He et al., 2010). Other ets-domain transcription  
354 factors that are involved in ERK signaling are *Etv1* and *Etv4*. While *Etv1* is expressed in  
355 myelinating Schwann cells (Srinivasan et al., 2007), it is not required for Schwann cell  
356 myelination (Fleming et al., 2016). In this regard, it is interesting to note that dominant negative  
357 *Etv5* misexpression in NCC cultures impacts neuronal fate specification, whereas glial fates  
358 are left unperturbed (Paratore et al., 2002). Our study similarly indicated that *Etv5* is not  
359 required for generation of mature Schwann cells. In contrast, the increase in Sox10<sup>+</sup> cell  
360 population in *Etv5*<sup>-/-</sup> sciatic nerve post-injury (compared to injured wild-type nerves) suggested  
361 that loss of *Etv5* expression may promote Schwann cell de-differentiation post-injury. Since  
362 ERK1/2 signaling is involved in both Schwann cell myelination (Ishii et al., 2013) as well as  
363 in promoting a de-differentiated Schwann cell state (Kim et al., 2013), the exact role of *Etv5*  
364 needs to be further investigated. Questions to be addressed in the future include whether  
365 Schwann cells myelinate axons normally in *Etv5*<sup>-/-</sup> animals, and if *Etv5* regulates Schwann cell  
366 proliferation post-injury in conjunction with *Sox2* and *Jun* activity, which play an important  
367 role in promoting the de-differentiated repair Schwann cell phenotype (Jessen and Mirsky,  
368 2019b).

369 In summary, while our study does not support a critical role for *Etv5* in Schwann cell  
370 development, we demonstrate that *Etv5* is involved in regulating the repair Schwann cell  
371 response post-injury.

372

373 **References**

- 374 Adameyko I, Lallemand F, Furlan A, Zinin N, Aranda S, Kitambi SS, Blanchart A, Favaro R, Nicolis S,  
375 Lubke M, Muller T, Birchmeier C, Suter U, Zaitoun I, Takahashi Y, Ernfors P (2012) Sox2 and  
376 Mitf cross-regulatory interactions consolidate progenitor and melanocyte lineages in the  
377 cranial neural crest. *Development* 139:397-410.
- 378 Ahmad ST, Rogers AD, Chen MJ, Dixit R, Adnani L, Frankiw LS, Lawn SO, Blough MD, Alshehri M, Wu  
379 W, Marra MA, Robbins SM, Cairncross JG, Schuurmans C, Chan JA (2019) Capicua regulates  
380 neural stem cell proliferation and lineage specification through control of Ets factors. *Nat*  
381 *Commun* 10:2000.
- 382 Arroyo EJ, Bermingham JR, Jr., Rosenfeld MG, Scherer SS (1998) Promyelinating Schwann cells  
383 express Tst-1/SCIP/Oct-6. *J Neurosci* 18:7891-7902.
- 384 Balakrishnan A, Stykel MG, Touahri Y, Stratton JA, Biernaskie J, Schuurmans C (2016) Temporal  
385 Analysis of Gene Expression in the Murine Schwann Cell Lineage and the Acutely Injured  
386 Postnatal Nerve. *PLoS One* 11:e0153256.
- 387 Cameron-Curry P, Dulac C, Le Douarin NM (1993) Negative regulation of Schwann cell myelin protein  
388 gene expression by the dorsal root ganglionic microenvironment. *Eur J Neurosci* 5:594-604.
- 389 Castelnovo LF, Bonalume V, Melfi S, Ballabio M, Colleoni D, Magnaghi V (2017) Schwann cell  
390 development, maturation and regeneration: a focus on classic and emerging intracellular  
391 signaling pathways. *Neural Regen Res* 12:1013-1023.
- 392 Chen C, Ouyang W, Grigura V, Zhou Q, Carnes K, Lim H, Zhao GQ, Arber S, Kurpios N, Murphy TL,  
393 Cheng AM, Hassell JA, Chandrashekar V, Hofmann MC, Hess RA, Murphy KM (2005) ERM is  
394 required for transcriptional control of the spermatogonial stem cell niche. *Nature* 436:1030-  
395 1034.



- 396 Cheung M, Briscoe J (2003) Neural crest development is regulated by the transcription factor Sox9.  
397 Development 130:5681-5693.
- 398 Chotteau-Lelievre A, Desbiens X, Pelczar H, Defossez PA, de Launoit Y (1997) Differential expression  
399 patterns of the PEA3 group transcription factors through murine embryonic development.  
400 Oncogene 15:937-952.
- 401 Feltri ML, Poitelon Y, Previtali SC (2015) How Schwann Cells Sort Axons: New Concepts.  
402 Neuroscientist.
- 403 Finzsch M, Schreiner S, Kichko T, Reeh P, Tamm ER, Bosl MR, Meijer D, Wegner M (2010) Sox10 is  
404 required for Schwann cell identity and progression beyond the immature Schwann cell stage.  
405 The Journal of cell biology 189:701-712.
- 406 Fleming MS, Li JJ, Ramos D, Li T, Talmage DA, Abe SI, Arber S, Luo W (2016) A RET-ER81-NRG1  
407 Signaling Pathway Drives the Development of Pacinian Corpuscles. J Neurosci 36:10337-  
408 10355.
- 409 Grossmann KS, Wende H, Paul FE, Cheret C, Garratt AN, Zurborg S, Feinberg K, Besser D, Schulz H,  
410 Peles E, Selbach M, Birchmeier W, Birchmeier C (2009) The tyrosine phosphatase Shp2  
411 (PTPN11) directs Neuregulin-1/ErbB signaling throughout Schwann cell development.  
412 Proceedings of the National Academy of Sciences of the United States of America  
413 106:16704-16709.
- 414 Guertin AD, Zhang DP, Mak KS, Alberta JA, Kim HA (2005) Microanatomy of axon/glia signaling  
415 during Wallerian degeneration. J Neurosci 25:3478-3487.
- 416 Hagedorn L, Paratore C, Brugnoli G, Baert JL, Mercader N, Suter U, Sommer L (2000) The Ets domain  
417 transcription factor Erm distinguishes rat satellite glia from Schwann cells and is regulated in  
418 satellite cells by neuregulin signaling. Developmental biology 219:44-58.

- 419 Harrisingh MC, Perez-Nadales E, Parkinson DB, Malcolm DS, Mudge AW, Lloyd AC (2004) The  
420 Ras/Raf/ERK signalling pathway drives Schwann cell dedifferentiation. *The EMBO journal*  
421 23:3061-3071.
- 422 He Y, Kim JY, Dupree J, Tewari A, Melendez-Vasquez C, Svaren J, Casaccia P (2010) Yy1 as a molecular  
423 link between neuregulin and transcriptional modulation of peripheral myelination. *Nat*  
424 *Neurosci* 13:1472-1480.
- 425 Ishii A, Furusho M, Bansal R (2013) Sustained activation of ERK1/2 MAPK in oligodendrocytes and  
426 schwann cells enhances myelin growth and stimulates oligodendrocyte progenitor  
427 expansion. *J Neurosci* 33:175-186.
- 428 Jasmin L, Vit JP, Bhargava A, Ohara PT (2010) Can satellite glial cells be therapeutic targets for pain  
429 control? *Neuron Glia Biol* 6:63-71.
- 430 Jessen KR, Mirsky R (2005) The origin and development of glial cells in peripheral nerves. *Nature*  
431 *reviews Neuroscience* 6:671-682.
- 432 Jessen KR, Mirsky R (2019a) Schwann Cell Precursors; Multipotent Glial Cells in Embryonic Nerves.  
433 *Front Mol Neurosci* 12:69.
- 434 Jessen KR, Mirsky R (2019b) The Success and Failure of the Schwann Cell Response to Nerve Injury.  
435 *Front Cell Neurosci* 13:33.
- 436 Ji RR, Berta T, Nedergaard M (2013) Glia and pain: is chronic pain a gliopathy? *Pain* 154 Suppl 1:S10-  
437 28.
- 438 Kastriti ME, Adameyko I (2017) Specification, plasticity and evolutionary origin of peripheral glial  
439 cells. *Curr Opin Neurobiol* 47:196-202.

- 440 Kim HA, Mindos T, Parkinson DB (2013) Plastic fantastic: Schwann cells and repair of the peripheral  
441 nervous system. *Stem Cells Transl Med* 2:553-557.
- 442 Klaes A, Menne T, Stollewerk A, Scholz H, Klambt C (1994) The Ets transcription factors encoded by  
443 the Drosophila gene pointed direct glial cell differentiation in the embryonic CNS. *Cell*  
444 78:149-160.
- 445 Kuhlbrodt K, Herbarth B, Sock E, Hermans-Borgmeyer I, Wegner M (1998) Sox10, a novel  
446 transcriptional modulator in glial cells. *J Neurosci* 18:237-250.
- 447 Kuure S, Chi X, Lu B, Costantini F (2010) The transcription factors Etv4 and Etv5 mediate formation of  
448 the ureteric bud tip domain during kidney development. *Development* 137:1975-1979.
- 449 Le N, Nagarajan R, Wang JY, Araki T, Schmidt RE, Milbrandt J (2005) Analysis of congenital  
450 hypomyelinating Egr2Lo/Lo nerves identifies Sox2 as an inhibitor of Schwann cell  
451 differentiation and myelination. *Proceedings of the National Academy of Sciences of the*  
452 *United States of America* 102:2596-2601.
- 453 Li S, Mattar P, Dixit R, Lawn SO, Wilkinson G, Kinch C, Eisenstat D, Kurrasch DM, Chan JA,  
454 Schuurmans C (2014) RAS/ERK signaling controls proneural genetic programs in cortical  
455 development and gliomagenesis. *J Neurosci* 34:2169-2190.
- 456 Li X, Newbern JM, Wu Y, Morgan-Smith M, Zhong J, Charron J, Snider WD (2012) MEK Is a Key  
457 Regulator of Gliogenesis in the Developing Brain. *Neuron* 75:1035-1050.
- 458 Lu BC, Cebrian C, Chi X, Kuure S, Kuo R, Bates CM, Arber S, Hassell J, MacNeil L, Hoshi M, Jain S, Asai  
459 N, Takahashi M, Schmidt-Ott KM, Barasch J, D'Agati V, Costantini F (2009) Etv4 and Etv5 are  
460 required downstream of GDNF and Ret for kidney branching morphogenesis. *Nat Genet*  
461 41:1295-1302.

- 462 Napoli I, Noon LA, Ribeiro S, Kerai AP, Parrinello S, Rosenberg LH, Collins MJ, Harrisingh MC, White IJ,  
463 Woodhoo A, Lloyd AC (2012) A central role for the ERK-signaling pathway in controlling  
464 Schwann cell plasticity and peripheral nerve regeneration in vivo. *Neuron* 73:729-742.
- 465 Newbern J, Birchmeier C (2010) Nrg1/ErbB signaling networks in Schwann cell development and  
466 myelination. *Seminars in Cell & Developmental Biology* 21:922-928.
- 467 Newbern JM, Li X, Shoemaker SE, Zhou J, Zhong J, Wu Y, Bonder D, Hollenback S, Coppola G,  
468 Geschwind DH, Landreth GE, Snider WD (2011) Specific functions for ERK/MAPK signaling  
469 during PNS development. *Neuron* 69:91-105.
- 470 Ohara PT, Vit JP, Bhargava A, Romero M, Sundberg C, Charles AC, Jasmin L (2009) Gliopathic pain:  
471 when satellite glial cells go bad. *Neuroscientist* 15:450-463.
- 472 Paratore C, Brugnoli G, Lee HY, Suter U, Sommer L (2002) The role of the Ets domain transcription  
473 factor Erm in modulating differentiation of neural crest stem cells. *Developmental biology*  
474 250:168-180.
- 475 Sedy J, Tseng S, Walro JM, Grim M, Kucera J (2006) ETS transcription factor ER81 is required for the  
476 Pacinian corpuscle development. *Dev Dyn* 235:1081-1089.
- 477 Sheean ME, McShane E, Cheret C, Walcher J, Muller T, Wulf-Goldenberg A, Hoelper S, Garratt AN,  
478 Kruger M, Rajewsky K, Meijer D, Birchmeier W, Lewin GR, Selbach M, Birchmeier C (2014)  
479 Activation of MAPK overrides the termination of myelin growth and replaces Nrg1/ErbB3  
480 signals during Schwann cell development and myelination. *Genes Dev* 28:290-303.
- 481 Song J, Ying Y, Wang W, Liu X, Xu X, Wei X, Ruan X (2018) The role of P2X7R/ERK signaling in dorsal  
482 root ganglia satellite glial cells in the development of chronic postsurgical pain induced by  
483 skin/muscle incision and retraction (SMIR). *Brain Behav Immun* 69:180-189.

- 484 Srinivasan R, Jang SW, Ward RM, Sachdev S, Ezashi T, Svaren J (2007) Differential regulation of NAB  
485 corepressor genes in Schwann cells. *BMC Mol Biol* 8:117.
- 486 Stewart HJ, Brennan A, Rahman M, Zoidl G, Mitchell PJ, Jessen KR, Mirsky R (2001) Developmental  
487 regulation and overexpression of the transcription factor AP-2, a potential regulator of the  
488 timing of Schwann cell generation. *Eur J Neurosci* 14:363-372.
- 489 Stratton JA, Kumar R, Sinha S, Shah P, Stykel M, Shapira Y, Midha R, Biernaskie J (2017) Purification  
490 and Characterization of Schwann Cells from Adult Human Skin and Nerve. *eNeuro* 4.
- 491 Touahri Y, Adnani L, Mattar P, Markham K, Klenin N, Schuurmans C (2015) Non-isotopic RNA In Situ  
492 Hybridization on Embryonic Sections. *Curr Protoc Neurosci* 70:1 22 21-21 22 25.
- 493 Tsang M, Dawid IB (2004) Promotion and attenuation of FGF signaling through the Ras-MAPK  
494 pathway. *Sci STKE* 2004:pe17.
- 495 von Schack D, Casademunt E, Schweigreiter R, Meyer M, Bibel M, Dechant G (2001) Complete  
496 ablation of the neurotrophin receptor p75NTR causes defects both in the nervous and the  
497 vascular system. *Nat Neurosci* 4:977-978.
- 498 Wang Y, Kim E, Wang X, Novitsch BG, Yoshikawa K, Chang LS, Zhu Y (2012) ERK inhibition rescues  
499 defects in fate specification of Nf1-deficient neural progenitors and brain abnormalities. *Cell*  
500 150:816-830.
- 501 Wang Z, Li L, Yang R, Xu X, Liang S (2019) P2X receptors mediated abnormal interaction between  
502 satellite glial cells and neurons in visceral pathological changes. *Cell Biol Int*.
- 503 Yang SH, Sharrocks AD, Whitmarsh AJ (2013) MAP kinase signalling cascades and transcriptional  
504 regulation. *Gene* 513:1-13.

505 Zhang YY, Song N, Liu F, Lin J, Liu MK, Huang CL, Liao DQ, Zhou C, Wang H, Shen JF (2020) Activation  
506 of the RAS/B-RAF-MEK-ERK pathway in satellite glial cells contributes to substance p-  
507 mediated orofacial pain. *Eur J Neurosci* 51:2205-2218.

508 Zhang Z, Verheyden JM, Hassell JA, Sun X (2009) FGF-regulated *Etv* genes are essential for repressing  
509 *Shh* expression in mouse limb buds. *Dev Cell* 16:607-613.

510

## 511 **FIGURE LEGENDS**

512 **Figure 1. Schwann cell transcriptional regulators are expressed normally in E12.5 *Etv5*<sup>-/-</sup>**  
513 **Schwann cell precursors (SCPs).** *Etv5*<sup>+</sup> neural crest cells give rise to *Etv5*<sup>+</sup> sensory neurons,  
514 *Etv5*<sup>+</sup> satellite glia, and *Etv5*<sup>-</sup> Schwann cell precursors (A). Schematic representation of E12.5  
515 trunk section (B). Distribution of *Etv5* transcripts in E12.5 transverse sections of the spinal  
516 cord (C). Co-expression of *Etv5* (red, D), *Sox9* (red, E-G,I) and *Sox10* (green, D,E,F,H,J) with  
517 DAPI counterstain (blue) in E12.5 wild-type (D,E,G,I) and *Etv5*<sup>-/-</sup> (F,H,J) embryos. Inset in (D)  
518 presents 3X magnified image of region marked by a dotted box. dr, dorsal root; drg, dorsal root  
519 ganglion; sc, spinal cord; vr, ventral root. Scale bars, 60  $\mu$ m.

520 **Figure 2. Schwann cell non-transcription factor lineage markers are expressed normally**  
521 **in E12.5 *Etv5*<sup>-/-</sup> SCs.** Co-expression of *Sox10* (green, A-D) with BFABP (red, A,B,  
522 black/white, A',B') and *Ngfr* (red, C,D, black/white, C',D'), counterstained with DAPI (blue,  
523 A-D) in E12.5 wild-type (A,A',C,C') and *Etv5*<sup>-/-</sup> (B,B',D,D') transverse sections through the  
524 trunk. dr, dorsal root; drg, dorsal root ganglion; sc, spinal cord ; vr, ventral root. Scale bars, 60  
525  $\mu$ m.

526 **Figure 3. Schwann cell lineage markers are expressed normally in E15.5 *Etv5*<sup>-/-</sup> immature**  
527 **Schwann cells (iSCs).** Low magnification DAPI-stained images of transverse sections through  
528 the lumbar spinal cord of E15.5 wild-type (A) and *Etv5*<sup>-/-</sup> (B) embryos. (C-H) Expression of

529 Sox9, Sox10 and Tfp2a in E15.5 wild-type (C,E,G) and *Etv5*<sup>-/-</sup> (D,F,H) transverse sections  
530 through the lumbar spinal cord. (I-P) Co-expression of Sox10 (green, I-P) with Sox2 (red, I,J,  
531 black/white, I',J'), BFABP (red, K,L, black/white, K',L'), GFAP (red, M,N, black/white,  
532 M',N'), and Ngfr (red, O,P, black/white, O',P'), counterstained with DAPI (blue, I-P) in E12.5  
533 wild-type (I,I',K,K',M,M',O,O') and *Etv5*<sup>-/-</sup> (J,J',L,L',N,N',P,P') transverse sections through  
534 the lumbar spinal cord. dr, dorsal root; drg, dorsal root ganglion; sc, spinal cord; vr, ventral  
535 root. Scale bars (A,B), 100  $\mu$ m; (C-P'), 60  $\mu$ m.

536 **Figure 4. Schwann cell lineage markers are expressed normally in E18.5 *Etv5*<sup>-/-</sup> late**  
537 **immature/pro-myelinating Schwann cells.** Labelling of Sox10 (A,B), NeuN (C,D), Pou3f1  
538 (E,F), and Glutamine Synthetase (GS; G,H) with DAPI counterstain in E18.5 wild-type  
539 (A,C,E,G) and *Etv5*<sup>-/-</sup> (B,D,F,H) transverse sections through the lumbar spinal cord.  
540 Quantification of percentage of Sox10<sup>+</sup>/DAPI<sup>+</sup> cells (I) in the dorsal root ganglia, dorsal and  
541 ventral root, and NeuN<sup>+</sup>/DAPI<sup>+</sup> cells (J) in the dorsal root ganglia. Error bars=s.e.m.. drg, dorsal  
542 root ganglion; sc, spinal cord; vr, ventral root; ns, non-significant. Scale bars, (A,B), 60  $\mu$ m;  
543 (C,D,G,H), 40  $\mu$ m; (E,F), 20  $\mu$ m.

544 **Figure 5. Increase in Sox10<sup>+</sup> Schwann cells post-injury in *Etv5*<sup>-/-</sup> sciatic nerve.** Sox10  
545 expression in longitudinal sections of the uninjured (A,B) and injured (C,D) P21 sciatic nerve  
546 from wild-type (A,C) and *Etv5*<sup>-/-</sup> (B,D) animals. Quantification of number of Sox10<sup>+</sup> cells (E)  
547 in the entire section. Error bars=s.e.m. \*, p < 0.05; \*\*, p < 0.01; \*\*\*, p < 0.005. Scale bars, 20  
548  $\mu$ m.

549

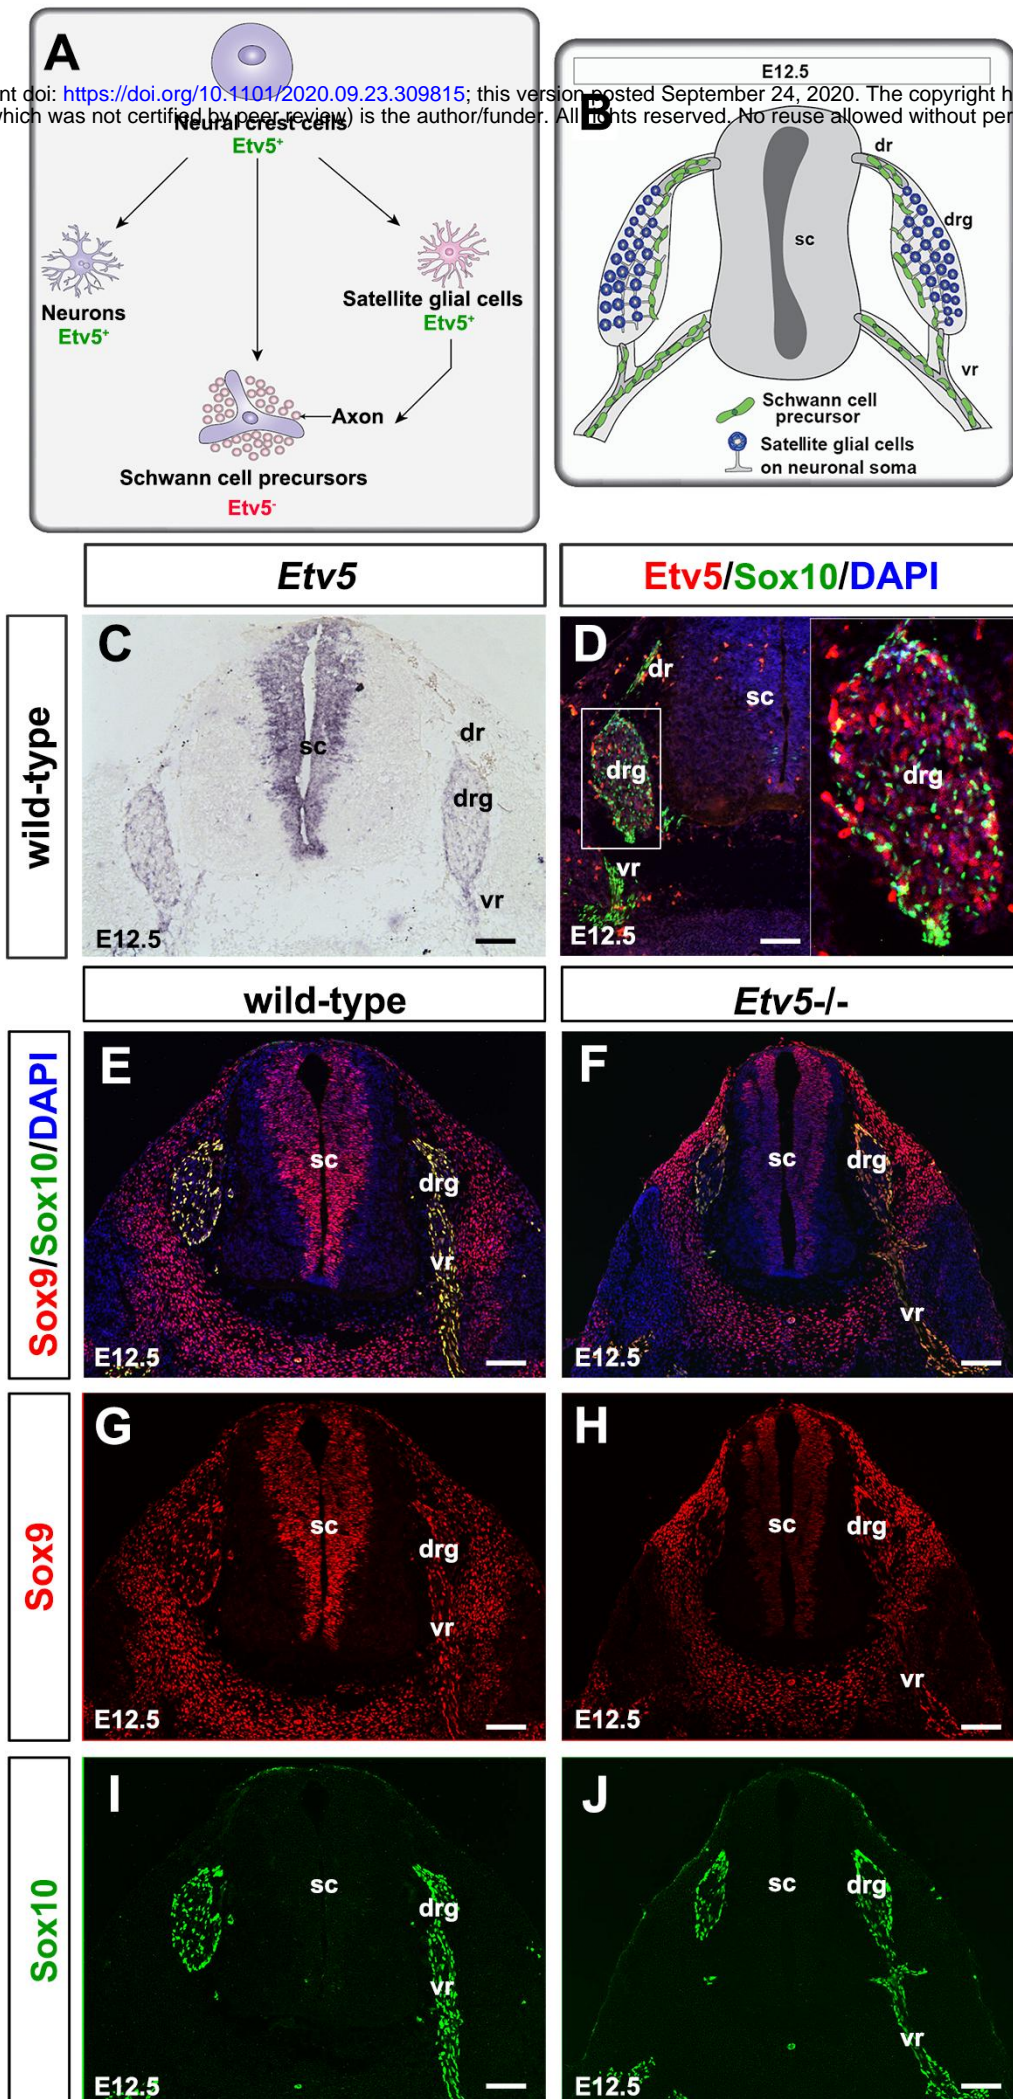



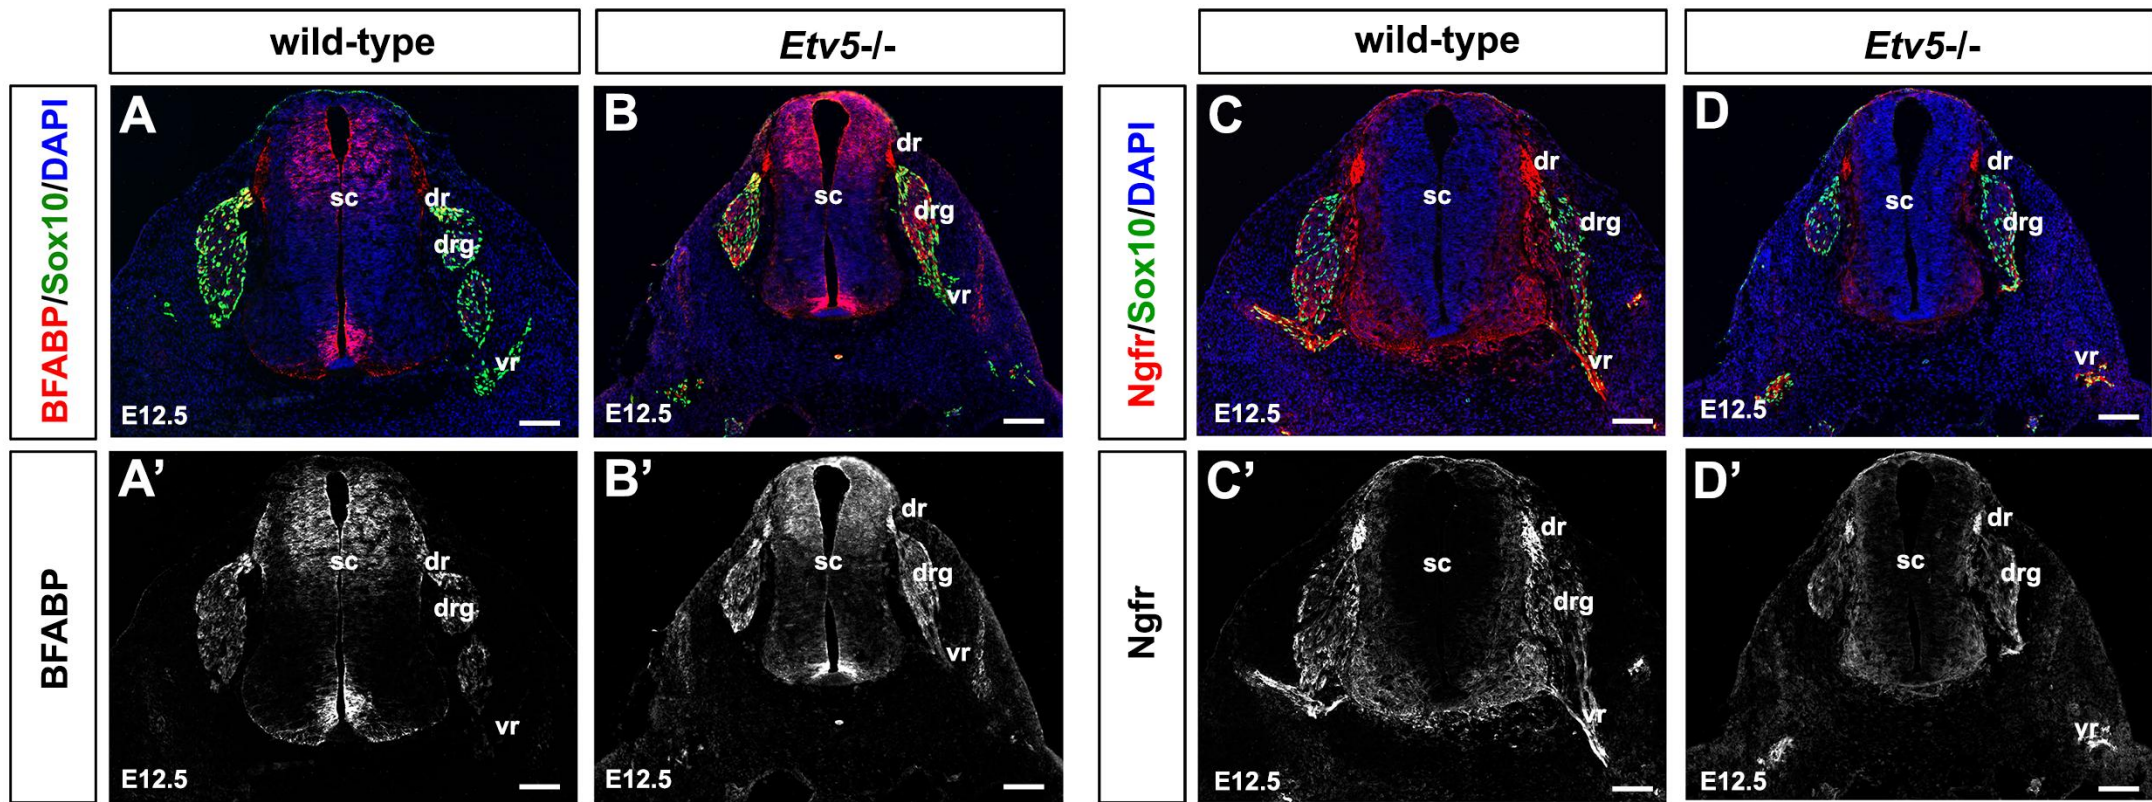

Balakrishnan et al Fig 2

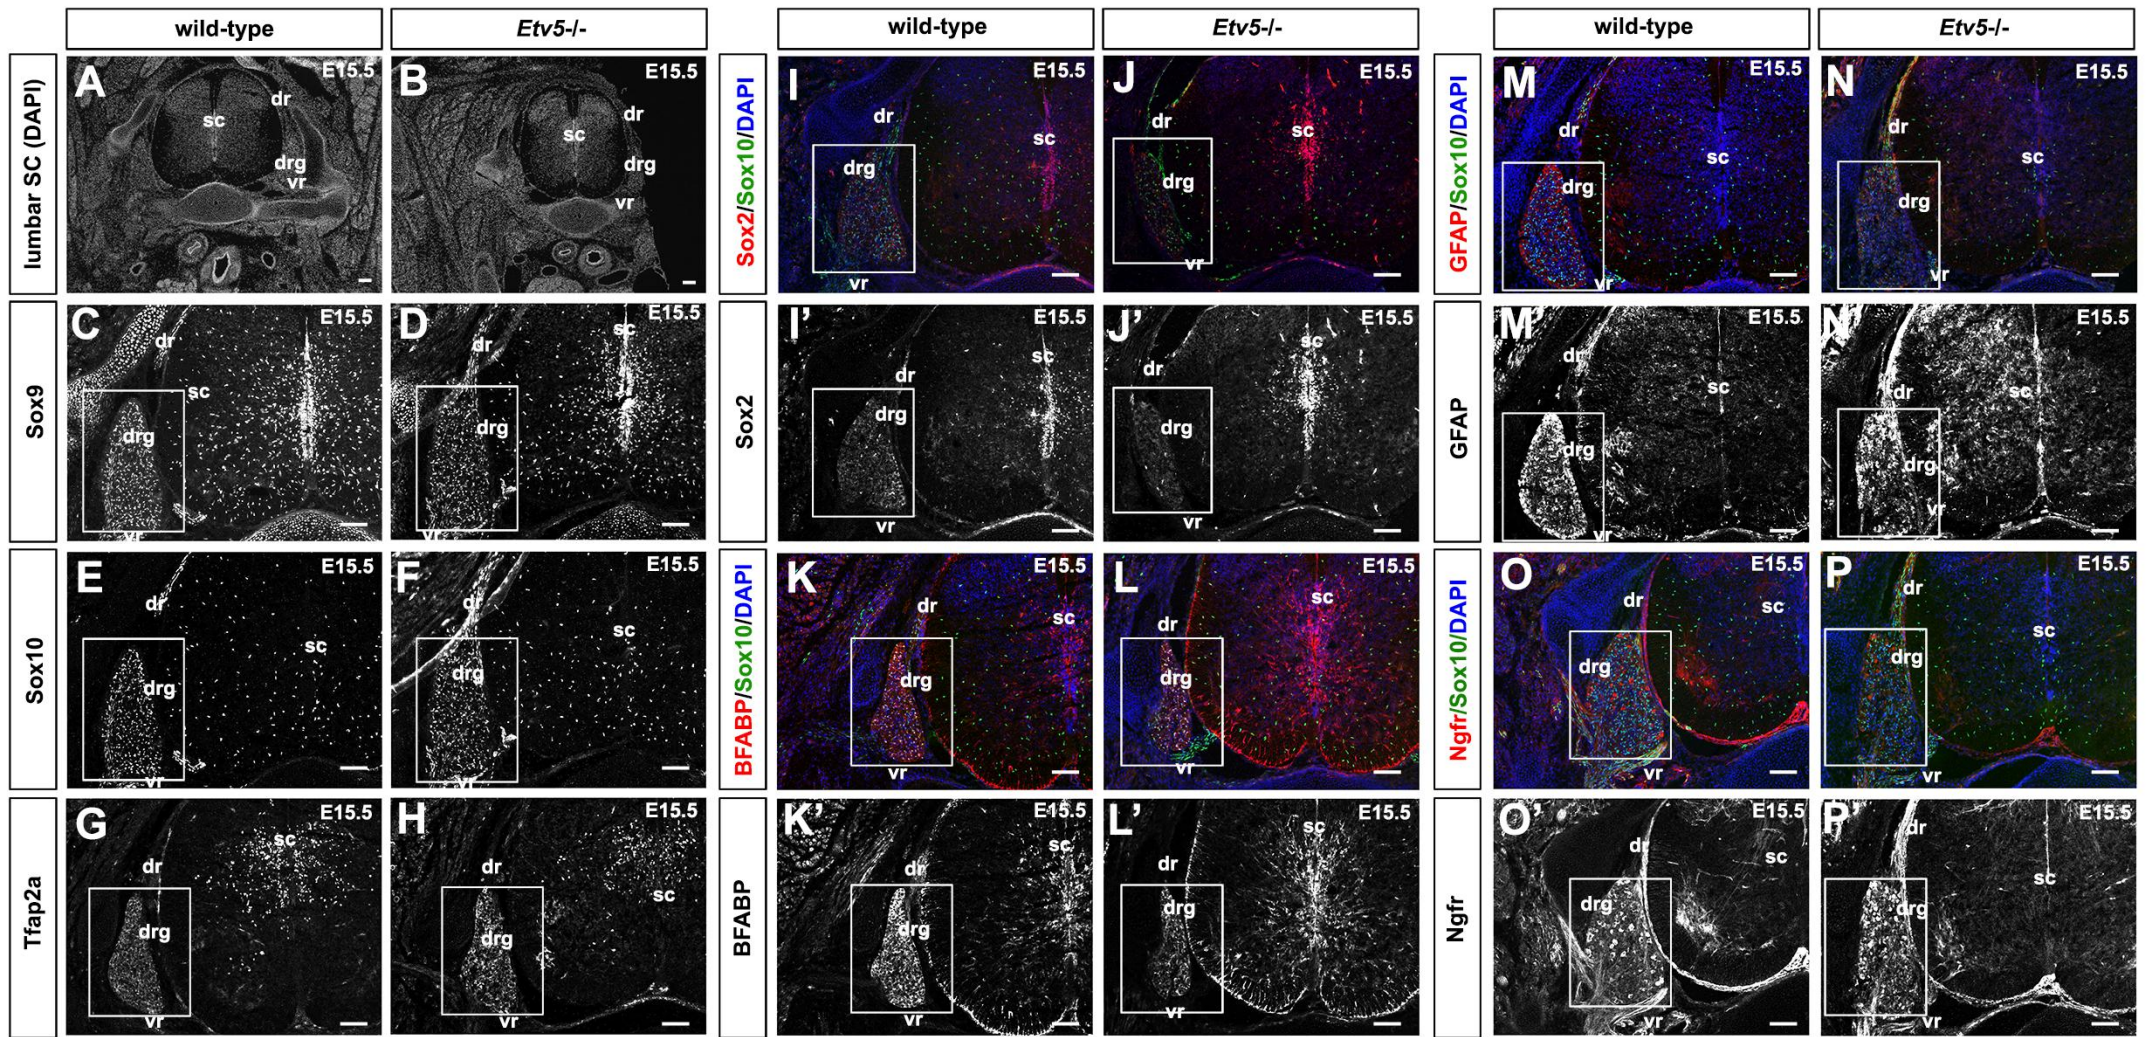

Balakrishnan et al Fig 3

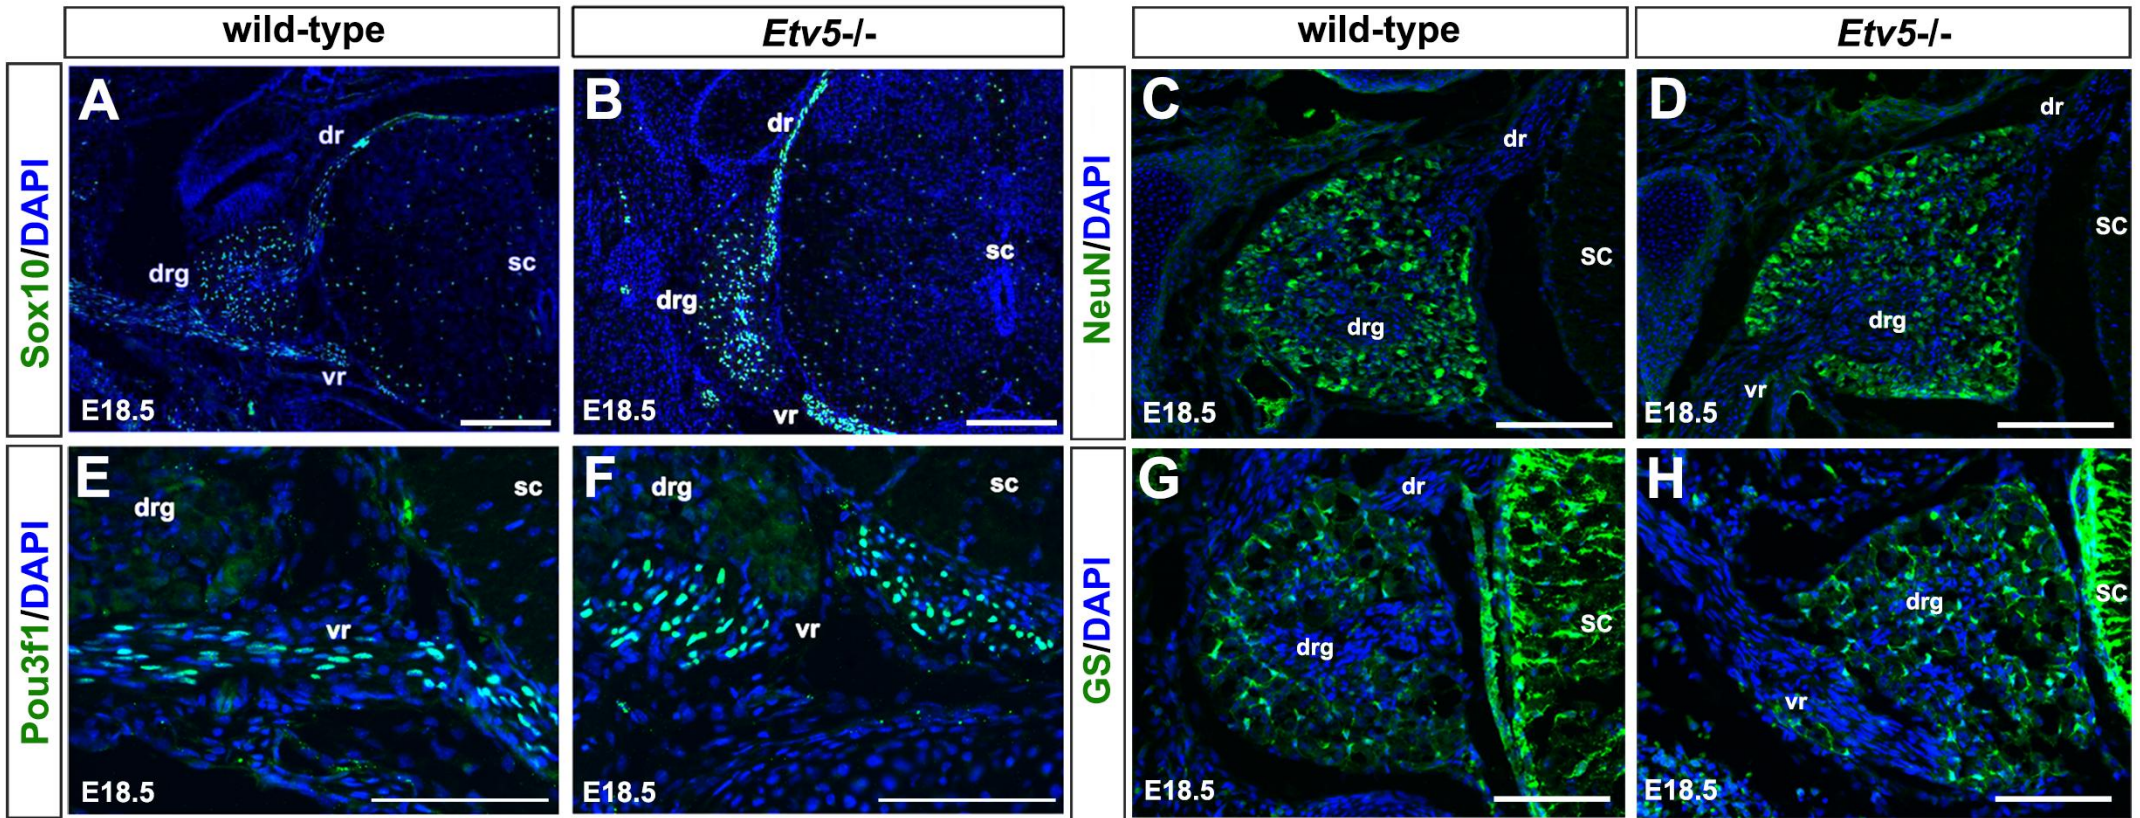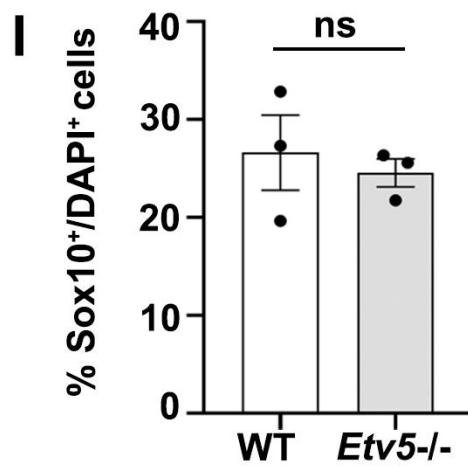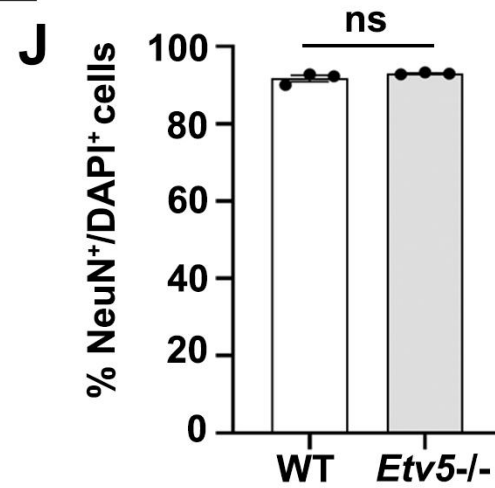

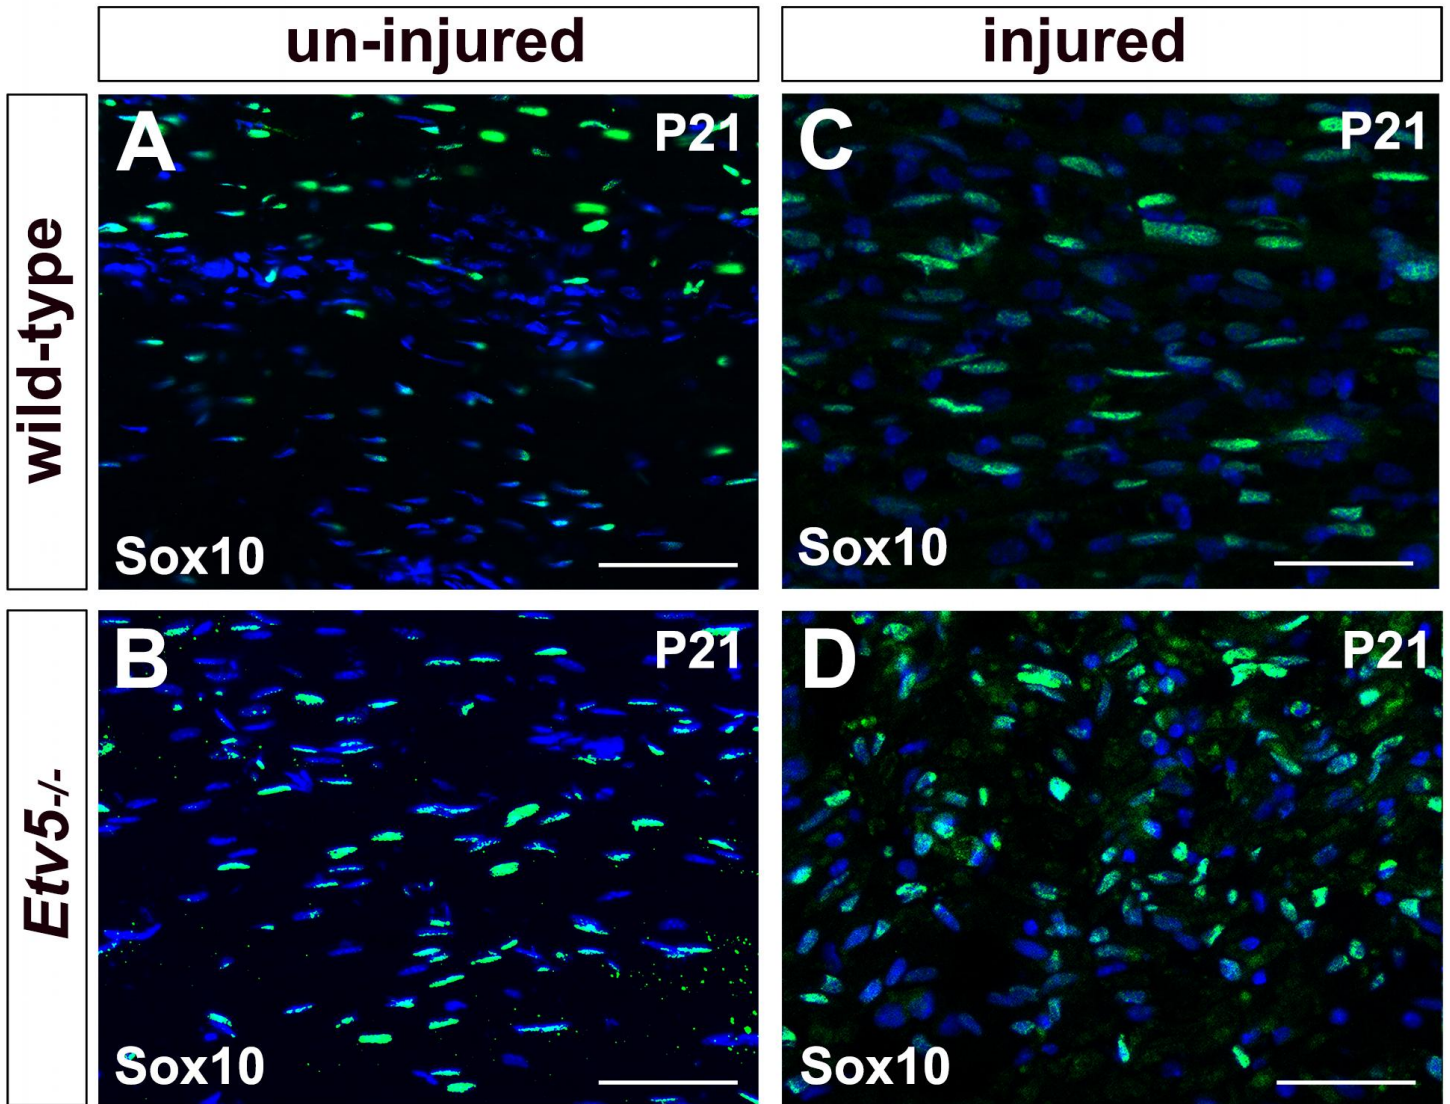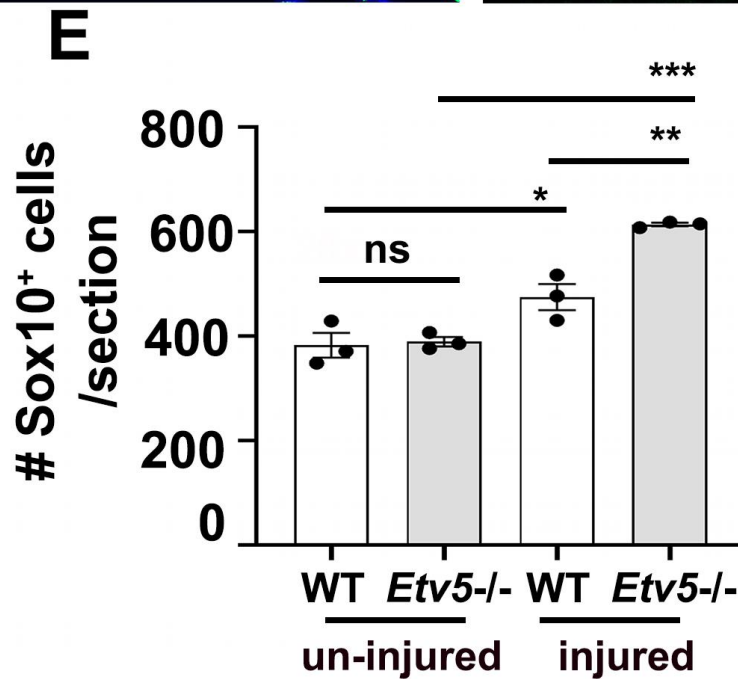

Source: https://www.biorxiv.org/content/10.1101/2020.09.23.309815v1.full.pdf
